# Supplementary material
Source: publisher site journal article supplement (https://www.dovepress.com/article/217867)
Supplement: Supplementary file 1 [file get_supplementary_file.php]

**SUPPLEMENTAL MATERIAL**

Figure S1 Density Plots of the Diary-to-Questionnaire Sleep Duration Ratios by Time Period in the Retirement and Sleep Trajectories Study (n = 5,313)a


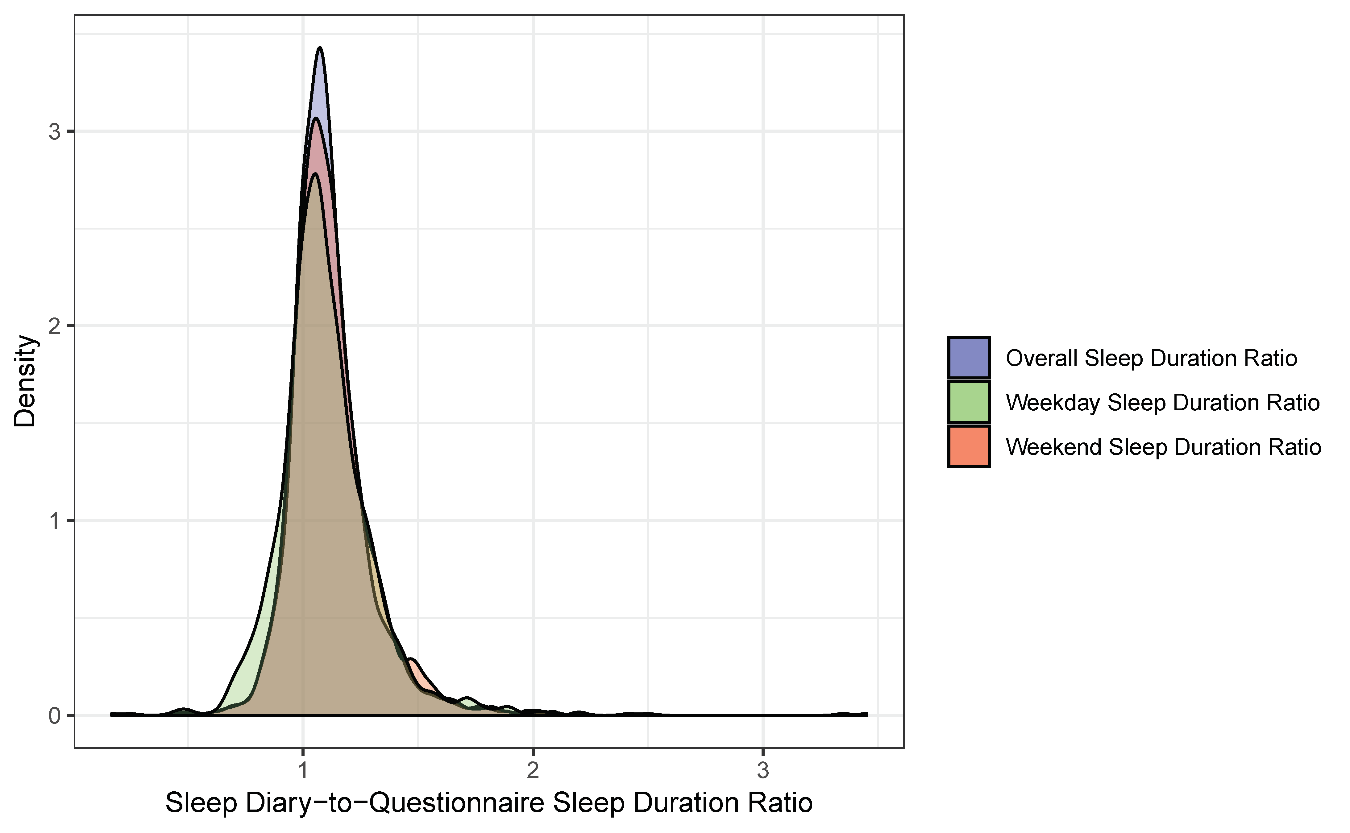


Key: Blue indicates overall sleep duration ratio; green indicates weekday-specific sleep duration ratio; red indicates weekend-specific sleep duration ratio.

aThere were 5,313 questionnaire-diary pairs for 1,516 study participants, and each participant returned at least one of potentially four questionnaire-diary pairs throughout the study duration.
